# Supplementary material for: Marked Variability in the Extent of Protein Disorder within and between Viral Families
Source: PubMed Central journal article supplement (PMC3631256; doi:10.1371/journal.pone.0060724), 2013-04-19

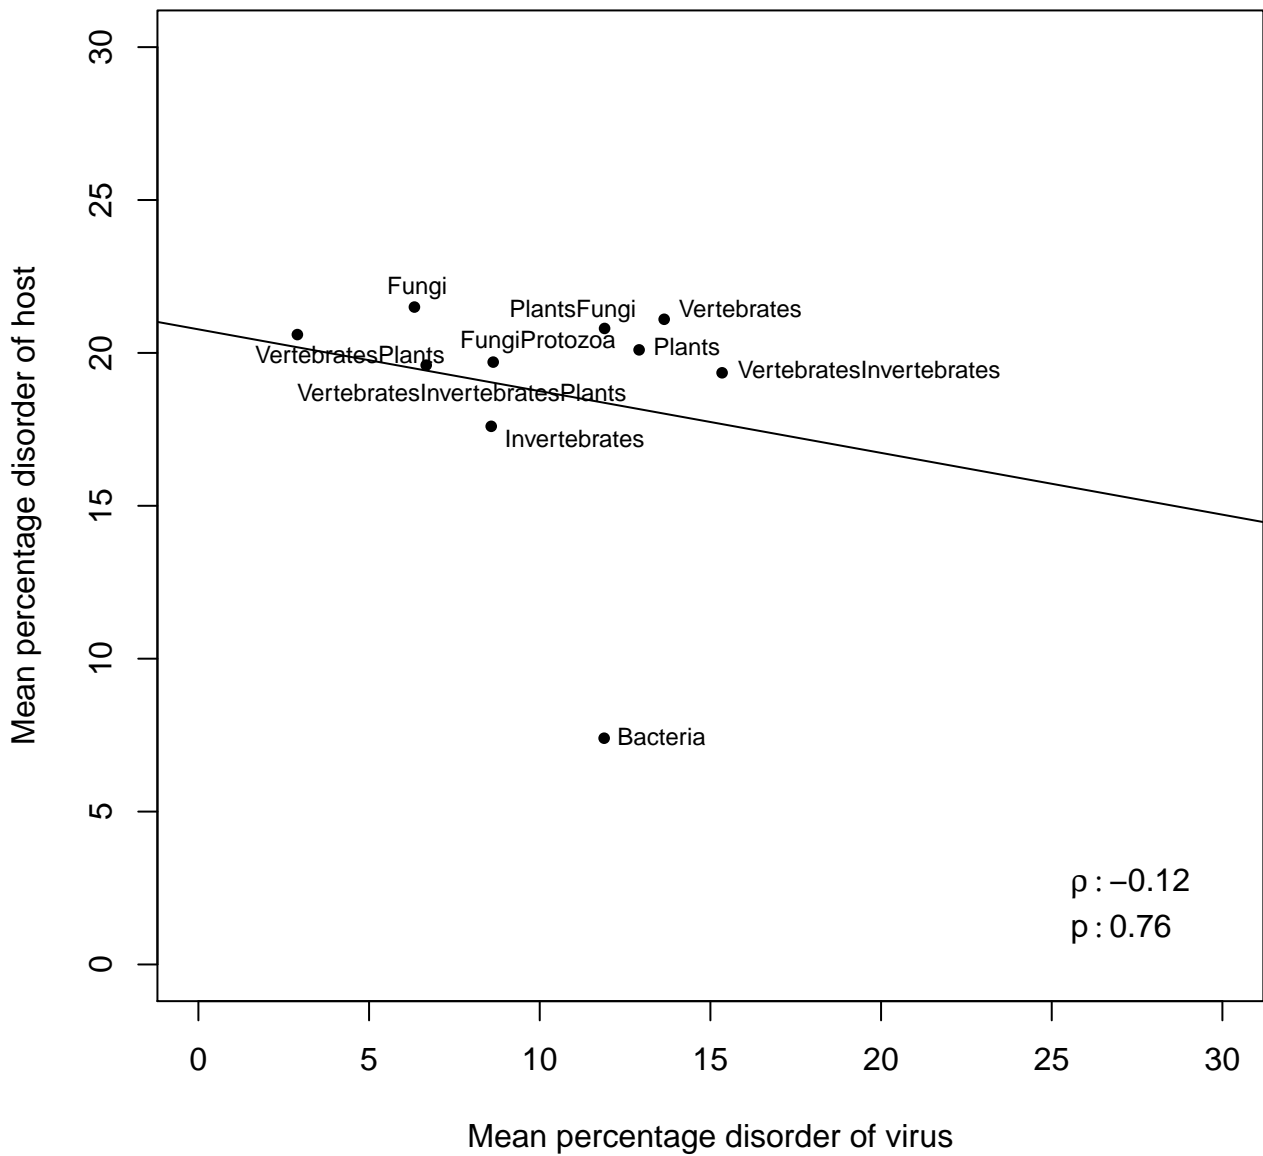

Supplement: pone.0060724.s012.pdf [file pone.0060724.s012.pdf]
