# Supplementary material for: Marked Variability in the Extent of Protein Disorder within and between Viral Families
Source: PubMed Central journal article supplement (PMC3631256; doi:10.1371/journal.pone.0060724), 2013-04-19
Supplement: pone.0060724.s015.pdf [file pone.0060724.s015.pdf]

**Table S1. Intrinsic disorder in viral genomes classified by the hosts they interact with.**

| <i>Host</i>                           | <i>N</i> <sup>a</sup> | <i>S</i> <sup>b</sup> (Kbp) |          | <i>D</i> <sup>c</sup> (%) |          | <i>Correlation</i> <sup>d</sup> |                                | <i>R</i> <sup>2</sup> <sub>B</sub> | <i>R</i> <sup>2</sup> <sub>BS</sub> | <i>p</i> <sup>e</sup>           |
|---------------------------------------|-----------------------|-----------------------------|----------|---------------------------|----------|---------------------------------|--------------------------------|------------------------------------|-------------------------------------|---------------------------------|
|                                       |                       | $\mu$                       | $\sigma$ | $\mu$                     | $\sigma$ | $\rho$                          | <i>p</i>                       |                                    |                                     |                                 |
| Plants                                | 638                   | 6.65                        | 3.50     | 12.91                     | 7.05     | -0.73                           | <b>2.20 x 10<sup>-16</sup></b> | 0.27                               | 0.61                                | <b>&lt;2 x 10<sup>-16</sup></b> |
| Vertebrates                           | 590                   | 22.85                       | 42.11    | 13.65                     | 8.76     | -0.35                           | <b>2.20 x 10<sup>-16</sup></b> | 0.21                               | 0.21                                | 0.30                            |
| Vertebrates/Invertebrates             | 108                   | 61.47                       | 85.63    | 15.34                     | 6.93     | -0.77                           | <b>2.20 x 10<sup>-16</sup></b> | 0.53                               | 0.74                                | <b>2.09 x 10<sup>-15</sup></b>  |
| Invertebrates                         | 90                    | 109.09                      | 86.58    | 8.58                      | 4.25     | 0.55                            | <b>2.97 x 10<sup>-8</sup></b>  | 0.17                               | 0.40                                | <b>1.75 x 10<sup>-7</sup></b>   |
| Bacteria                              | 108                   | 37.41                       | 17.85    | 11.89                     | 3.39     | 0.44                            | <b>2.34 x 10<sup>-6</sup></b>  | 0.19                               | 0.41                                | <b>7.26 x 10<sup>-9</sup></b>   |
| Bacteria, Archaea                     | 346                   | 65.88                       | 49.05    | 12.36                     | 3.95     | 0.19                            | <b>3.22 x 10<sup>-4</sup></b>  | 0.59                               | 0.60                                | 0.04                            |
| Plants, Fungi                         | 71                    | 6.54                        | 2.86     | 11.90                     | 4.80     | 0.31                            | 8.81 x 10 <sup>-3</sup>        | 0.32                               | 0.33                                | 0.17                            |
| Fungi                                 | 19                    | 6.23                        | 4.40     | 6.33                      | 5.59     | 0.57                            | 0.01                           | 0.65                               | 0.66                                | 0.32                            |
| Archaea                               | 26                    | 29.35                       | 15.11    | 6.32                      | 2.00     | -0.37                           | 0.06                           | -0.02                              | -0.05                               | 0.57                            |
| Fungi, Protozoa                       | 29                    | 5.67                        | 1.72     | 8.64                      | 4.31     | 0.23                            | 0.23                           | 0.39                               | 0.36                                | 0.89                            |
| Vertebrates/Invertebrates,<br>Plants  | 39                    | 23.52                       | 5.87     | 6.23                      | 1.49     | 0.16                            | 0.34                           | 0.10                               | 0.09                                | 0.44                            |
| Bacteria, Mycoplasmas                 | 26                    | 7.29                        | 1.08     | 10.43                     | 4.19     | -0.09                           | 0.65                           | 0.60                               | 0.58                                | 1.00                            |
| Vertebrates,<br>Invertebrates, Plants | 27                    | 12.42                       | 1.21     | 7.32                      | 1.34     | -0.08                           | 0.69                           | -0.01                              | 0.03                                | 0.17                            |
| Vertebrates, Plants                   | 25                    | 13.98                       | 2.70     | 2.90                      | 1.22     | 0.06                            | 0.77                           | -0.02                              | 0.40                                | <b>7.01 x 10<sup>-4</sup></b>   |
| Bacteria, Spiroplasmas                | 15                    | 5.12                        | 0.65     | 13.51                     | 4.76     | 0.05                            | 0.87                           | 0.75                               | 0.87                                | 6.90 x 10 <sup>-3</sup>         |

<sup>a</sup>Number of genomes in the family.

<sup>b</sup>Genome size;  $\mu$  and  $\sigma$  represent the mean and standard deviation respectively.

<sup>c</sup>Percent protein disorder as defined in Materials & Methods.

<sup>d</sup>Correlation between disorder and genome size;  $\rho$  and *p* represent coefficient of correlation and probability respectively.

<sup>e</sup>Probability that genome size is a significant predictor of disorder, from an analysis of variance model including the composition of the four bases as covariates. Significant probabilities after Bonferroni correction are marked in bold.
