# Supplementary material for: Marked Variability in the Extent of Protein Disorder within and between Viral Families
Source: PubMed Central journal article supplement (PMC3631256; doi:10.1371/journal.pone.0060724), 2013-04-19
Supplement: pone.0060724.s016.pdf [file pone.0060724.s016.pdf]

**Table S2. Variance in genome size explained by base composition.**

| <i>Family</i>            | <i>N</i> <sup>a</sup> | <i>S (Kbp)</i> <sup>b</sup> |          | <i>R</i> <sup>2</sup> | <i>p</i> <sup>c</sup>          |
|--------------------------|-----------------------|-----------------------------|----------|-----------------------|--------------------------------|
|                          |                       | $\mu$                       | $\sigma$ |                       |                                |
| <i>Microviridae</i>      | 15                    | 5.12                        | 0.65     | 0.76                  | <b>2.63 x 10<sup>-4</sup></b>  |
| <i>Caliciviridae</i>     | 21                    | 7.72                        | 0.54     | 0.74                  | <b>2.77 x 10<sup>-5</sup></b>  |
| <i>Togaviridae</i>       | 17                    | 11.52                       | 0.49     | 0.72                  | <b>5.34 x 10<sup>-4</sup></b>  |
| <i>Secoviridae</i>       | 32                    | 11.19                       | 1.61     | 0.71                  | <b>8.04 x 10<sup>-8</sup></b>  |
| <i>Nodaviridae</i>       | 12                    | 4.49                        | 0.08     | 0.66                  | 0.02                           |
| <i>Parvoviridae</i>      | 53                    | 5.09                        | 0.55     | 0.58                  | <b>1.65 x 10<sup>-9</sup></b>  |
| <i>Retroviridae</i>      | 57                    | 8.45                        | 2.39     | 0.54                  | <b>3.41 x 10<sup>-9</sup></b>  |
| <i>Anelloviridae</i>     | 36                    | 3.26                        | 0.54     | 0.54                  | <b>1.02 x 10<sup>-5</sup></b>  |
| <i>Virgaviridae</i>      | 38                    | 8.11                        | 2.17     | 0.53                  | <b>2.57 x 10<sup>-6</sup></b>  |
| <i>Rhabdoviridae</i>     | 27                    | 12.42                       | 1.21     | 0.52                  | <b>4.12 x 10<sup>-4</sup></b>  |
| <i>Bunyaviridae</i>      | 25                    | 13.98                       | 2.70     | 0.39                  | 3.46 x 10 <sup>-3</sup>        |
| <i>Paramyxoviridae</i>   | 33                    | 15.86                       | 1.28     | 0.34                  | 1.60 x 10 <sup>-3</sup>        |
| <i>Tymoviridae</i>       | 21                    | 6.42                        | 0.37     | 0.33                  | 0.03                           |
| <i>Picornaviridae</i>    | 56                    | 7.67                        | 0.48     | 0.33                  | <b>6.03 x 10<sup>-5</sup></b>  |
| <i>Arenaviridae</i>      | 26                    | 10.52                       | 0.15     | 0.27                  | 0.03                           |
| <i>Baculoviridae</i>     | 53                    | 131.86                      | 21.97    | 0.26                  | <b>8.91 x 10<sup>-4</sup></b>  |
| <i>Betaflexiviridae</i>  | 46                    | 8.28                        | 0.61     | 0.26                  | 2.44 x 10 <sup>-3</sup>        |
| <i>Dicistroviridae</i>   | 14                    | 9.29                        | 0.57     | 0.26                  | 0.16                           |
| <i>Myoviridae</i>        | 102                   | 109.18                      | 70.18    | 0.24                  | <b>4.46 x 10<sup>-6</sup></b>  |
| <i>Potyviridae</i>       | 79                    | 9.83                        | 0.41     | 0.21                  | <b>2.08 x 10<sup>-4</sup></b>  |
| <i>Coronaviridae</i>     | 52                    | 29.30                       | 1.31     | 0.21                  | 4.11 x 10 <sup>-3</sup>        |
| <i>Reoviridae</i>        | 39                    | 23.52                       | 5.87     | 0.20                  | 0.02                           |
| <i>Siphoviridae</i>      | 244                   | 47.79                       | 15.91    | 0.19                  | <b>7.06 x 10<sup>-11</sup></b> |
| <i>Tombusviridae</i>     | 43                    | 4.27                        | 0.46     | 0.16                  | 0.03                           |
| <i>Podoviridae</i>       | 91                    | 42.59                       | 14.18    | 0.15                  | <b>9.72 x 10<sup>-4</sup></b>  |
| <i>Poxviridae</i>        | 27                    | 185.60                      | 51.15    | 0.15                  | 0.11                           |
| <i>Luteoviridae</i>      | 22                    | 5.74                        | 0.15     | 0.13                  | 0.18                           |
| <i>Partitiviridae</i>    | 25                    | 4.25                        | 0.68     | 0.10                  | 0.20                           |
| <i>Flaviviridae</i>      | 52                    | 10.96                       | 1.76     | 0.08                  | 0.09                           |
| <i>Alphaflexiviridae</i> | 40                    | 6.80                        | 0.81     | 0.07                  | 0.17                           |

|                         |     |        |       |       |      |
|-------------------------|-----|--------|-------|-------|------|
| <i>Papillomaviridae</i> | 96  | 7.67   | 0.33  | 0.06  | 0.04 |
| <i>Herpesviridae</i>    | 42  | 163.97 | 43.17 | 0.03  | 0.27 |
| <i>Geminiviridae</i>    | 254 | 3.59   | 1.20  | 0.03  | 0.02 |
| <i>Caulimoviridae</i>   | 36  | 7.82   | 0.44  | 0.03  | 0.31 |
| <i>Totiviridae</i>      | 29  | 5.67   | 1.72  | 0.03  | 0.34 |
| <i>Adenoviridae</i>     | 26  | 34.85  | 8.34  | 0.00  | 0.40 |
| <i>Bromoviridae</i>     | 29  | 8.43   | 0.27  | 0.00  | 0.44 |
| <i>Polyomaviridae</i>   | 21  | 5.14   | 0.17  | -0.08 | 0.65 |
| <i>Inoviridae</i>       | 26  | 7.29   | 1.08  | -0.10 | 0.87 |
| <i>Closteroviridae</i>  | 25  | 16.31  | 1.38  | -0.12 | 0.84 |
| <i>Circoviridae</i>     | 16  | 2.05   | 0.41  | -0.28 | 0.95 |

<sup>a</sup>Number of genomes in the family.

<sup>b</sup>Genome size;  $\mu$  and  $\sigma$  represent the mean and standard deviation respectively.

<sup>c</sup>Probability that genome size is a significant predictor of disorder, from an analysis of variance model including the composition of the four bases as covariates. Significant probabilities after Bonferroni correction are marked in bold.
