# Supplementary material for: Marked Variability in the Extent of Protein Disorder within and between Viral Families
Source: PubMed Central journal article supplement (PMC3631256; doi:10.1371/journal.pone.0060724), 2013-04-19
Supplement: pone.0060724.s017.pdf [file pone.0060724.s017.pdf]

**Table S3: Percentage of variance in disorder (Adjusted  $R^2$  for the rank of IUPRED predicted disorder) accounted for by various combinations of predictors fitted in a linear regression model.**

| <i>Predictor(s)<sup>a</sup></i> | <i>Adjusted <math>R^2</math></i> |
|---------------------------------|----------------------------------|
| A                               | 0.04                             |
| T                               | 0.25                             |
| G                               | 0.03                             |
| C                               | 0.22                             |
| A, T, G, C,                     | 0.35                             |
| A, T, G, C, S                   | 0.41                             |
| S                               | 0.09                             |
| Type                            | 0.36                             |
| H                               | 0.10                             |
| F                               | 0.74                             |
| Type, H, F                      | 0.74                             |
| Type, A, T, G, C                | 0.59                             |
| H, A, T, G, C                   | 0.42                             |
| F, A, T, G, C                   | 0.83                             |
| F, S                            | 0.74                             |
| F, A, T, G, C, S                | 0.83                             |

<sup>a</sup>A: % Adenine; T: % Thymine; G: % Guanine; C: % Cytosine. S: rank of genome size (ranked in order to correct for markedly non-normal distribution). Type: viral type (see Table 1); H: viral host (see Table S1); F: viral family (see Table 2).
