# Supplementary material for: Marked Variability in the Extent of Protein Disorder within and between Viral Families
Source: PubMed Central journal article supplement (PMC3631256; doi:10.1371/journal.pone.0060724), 2013-04-19
Supplement: pone.0060724.s019.pdf [file pone.0060724.s019.pdf]

**Table S5:** Relationship between disorder and genome size within each family (like main Table 2, with interquartile ranges/minima/maxima indicating the spread of disorder within each family).

| Family                   | N <sup>a</sup> | S <sup>b</sup> (Kbp) |       | D <sup>c</sup> (%) |      | Correlation <sup>d</sup> |      |      |      |       |                               | R <sup>2</sup> <sub>B</sub> | R <sup>2</sup> <sub>BS</sub> | p <sup>e</sup>                |
|--------------------------|----------------|----------------------|-------|--------------------|------|--------------------------|------|------|------|-------|-------------------------------|-----------------------------|------------------------------|-------------------------------|
|                          |                | μ                    | σ     | μ                  | σ    | interquartile            | Min  | Max  | ρ    | P     |                               |                             |                              |                               |
| <i>Geminiviridae</i>     | 254            | 3.59                 | 1.20  | 18.57              | 3.13 | 16.6                     | 20.7 | 9.3  | 26.2 | -0.38 | <b>5.0 x 10<sup>-10</sup></b> | 0.10                        | 0.22                         | <b>2.51 x 10<sup>-9</sup></b> |
| <i>Virgaviridae</i>      | 38             | 8.11                 | 2.17  | 4.93               | 2.45 | 3.2                      | 6.0  | 1.9  | 11.5 | 0.78  | <b>9.9 x 10<sup>-9</sup></b>  | 0.13                        | 0.64                         | <b>3.70 x 10<sup>-8</sup></b> |
| <i>Alphaflexiviridae</i> | 40             | 6.80                 | 0.81  | 13.94              | 4.58 | 10.3                     | 17.4 | 3.8  | 24.5 | 0.57  | <b>1.7 x 10<sup>-4</sup></b>  | 0.35                        | 0.71                         | <b>1.16 x 10<sup>-7</sup></b> |
| <i>Podoviridae</i>       | 91             | 42.59                | 14.18 | 12.47              | 2.93 | 10.6                     | 13.7 | 6.0  | 20.9 | 0.29  | 5.9 x 10 <sup>-3</sup>        | 0.24                        | 0.35                         | <b>2.29 x 10<sup>-4</sup></b> |
| <i>Bromoviridae</i>      | 29             | 8.43                 | 0.27  | 8.52               | 2.01 | 7.2                      | 9.6  | 5.6  | 12.7 | 0.57  | 1.5 x 10 <sup>-3</sup>        | 0.30                        | 0.59                         | <b>2.73 x 10<sup>-4</sup></b> |
| <i>Bunyaviridae</i>      | 25             | 13.98                | 2.70  | 2.90               | 1.22 | 2.3                      | 3.6  | 1.0  | 6.6  | 0.06  | 0.77                          | -0.02                       | 0.40                         | <b>7.01 x 10<sup>-4</sup></b> |
| <i>Myoviridae</i>        | 102            | 109.18               | 70.18 | 11.42              | 3.91 | 8.8                      | 12.7 | 4.7  | 29.0 | -0.29 | 3.1 x 10 <sup>-3</sup>        | 0.57                        | 0.61                         | <b>1.17 x 10<sup>-3</sup></b> |
| <i>Microviridae</i>      | 15             | 5.12                 | 0.65  | 13.51              | 4.76 | 11.8                     | 13.6 | 8.1  | 29.9 | 0.05  | 0.87                          | 0.75                        | 0.87                         | 6.90 x 10 <sup>-3</sup>       |
| <i>Poxviridae</i>        | 27             | 185.60               | 51.15 | 5.63               | 2.75 | 3.6                      | 5.9  | 2.7  | 13.9 | 0.11  | 0.57                          | 0.83                        | 0.87                         | 0.01                          |
| <i>Paramyxoviridae</i>   | 33             | 15.86                | 1.28  | 12.37              | 2.97 | 9.5                      | 14.3 | 8.2  | 18.3 | 0.41  | 0.02                          | 0.14                        | 0.29                         | 0.01                          |
| <i>Potyviridae</i>       | 79             | 9.83                 | 0.41  | 5.51               | 1.54 | 4.4                      | 6.4  | 2.7  | 10.4 | 0.06  | 0.59                          | 0.22                        | 0.27                         | 0.01                          |
| <i>Secoviridae</i>       | 32             | 11.19                | 1.61  | 4.16               | 2.08 | 2.7                      | 5.4  | 1.2  | 9.8  | 0.71  | <b>4.7 x 10<sup>-6</sup></b>  | 0.37                        | 0.48                         | 0.01                          |
| <i>Coronaviridae</i>     | 52             | 29.30                | 1.31  | 3.68               | 1.33 | 3.1                      | 4.2  | 1.8  | 8.4  | 0.29  | 0.04                          | 0.32                        | 0.39                         | 0.02                          |
| <i>Picornaviridae</i>    | 56             | 7.67                 | 0.48  | 6.53               | 2.51 | 4.5                      | 8.5  | 2.3  | 11.5 | 0.59  | <b>2.2 x 10<sup>-6</sup></b>  | 0.72                        | 0.74                         | 0.02                          |
| <i>Parvoviridae</i>      | 53             | 5.09                 | 0.55  | 19.96              | 3.66 | 17.8                     | 22.5 | 13.1 | 32.0 | -0.42 | 1.7 x 10 <sup>-3</sup>        | 0.30                        | 0.35                         | 0.03                          |
| <i>Tombusviridae</i>     | 43             | 4.27                 | 0.46  | 10.29              | 3.12 | 8.2                      | 12.7 | 4.4  | 17.1 | -0.26 | 0.10                          | 0.32                        | 0.38                         | 0.04                          |
| <i>Papillomaviridae</i>  | 96             | 7.67                 | 0.33  | 21.17              | 4.02 | 18.7                     | 23.3 | 10.8 | 30.1 | -0.14 | 0.18                          | 0.46                        | 0.47                         | 0.09                          |
| <i>Closteroviridae</i>   | 25             | 16.31                | 1.38  | 5.85               | 1.98 | 4.6                      | 7.3  | 2.3  | 10.5 | -0.22 | 0.29                          | 0.17                        | 0.24                         | 0.10                          |
| <i>Luteoviridae</i>      | 22             | 5.74                 | 0.15  | 23.08              | 2.36 | 20.9                     | 24.9 | 19.8 | 29.0 | 0.43  | 0.04                          | 0.34                        | 0.41                         | 0.11                          |
| <i>Nodaviridae</i>       | 12             | 4.49                 | 0.08  | 18.51              | 2.33 | 17.0                     | 18.8 | 15.4 | 22.9 | 0.11  | 0.74                          | 0.74                        | 0.80                         | 0.11                          |
| <i>Polyomaviridae</i>    | 21             | 5.14                 | 0.17  | 18.62              | 4.80 | 15.8                     | 20.6 | 10.5 | 30.5 | 0.40  | 0.07                          | 0.69                        | 0.71                         | 0.16                          |
| <i>Rhabdoviridae</i>     | 27             | 12.42                | 1.21  | 7.32               | 1.34 | 6.4                      | 8.0  | 4.3  | 11.4 | -0.08 | 0.69                          | -0.01                       | 0.03                         | 0.17                          |

|                         |     |        |       |       |      |      |      |      |      |       |                       |      |      |      |
|-------------------------|-----|--------|-------|-------|------|------|------|------|------|-------|-----------------------|------|------|------|
| <i>Adenoviridae</i>     | 26  | 34.85  | 8.34  | 16.14 | 4.59 | 14.0 | 17.8 | 8.4  | 25.4 | 0.60  | $1.5 \times 10^{-3}$  | 0.74 | 0.75 | 0.17 |
| <i>Partitiviridae</i>   | 25  | 4.25   | 0.68  | 9.88  | 3.74 | 7.9  | 11.2 | 3.0  | 11.7 | 0.20  | 0.35                  | 0.32 | 0.34 | 0.23 |
| <i>Siphoviridae</i>     | 244 | 47.79  | 15.91 | 12.75 | 3.91 | 9.7  | 15.2 | 6.7  | 28.2 | 0.55  | $2.2 \times 10^{-16}$ | 0.62 | 0.62 | 0.23 |
| <i>Togaviridae</i>      | 17  | 11.52  | 0.49  | 8.78  | 3.13 | 7.4  | 9.2  | 4.4  | 17.4 | 0.36  | 0.15                  | 0.78 | 0.79 | 0.26 |
| <i>Flaviviridae</i>     | 52  | 10.96  | 1.76  | 5.23  | 1.84 | 4.1  | 6.1  | 2.2  | 10.0 | -0.15 | 0.28                  | 0.71 | 0.71 | 0.30 |
| <i>Retroviridae</i>     | 57  | 8.45   | 2.39  | 17.94 | 7.01 | 13.1 | 20.6 | 2.5  | 38.9 | -0.17 | 0.21                  | 0.24 | 0.24 | 0.33 |
| <i>Arenaviridae</i>     | 26  | 10.52  | 0.15  | 3.58  | 0.80 | 3.0  | 4.2  | 2.4  | 5.9  | -0.09 | 0.67                  | 0.12 | 0.12 | 0.35 |
| <i>Reoviridae</i>       | 39  | 23.52  | 5.87  | 6.23  | 1.49 | 5.1  | 7.0  | 3.3  | 9.8  | 0.16  | 0.34                  | 0.10 | 0.09 | 0.44 |
| <i>Baculoviridae</i>    | 53  | 131.86 | 21.97 | 8.14  | 1.50 | 7.0  | 8.9  | 5.4  | 12.0 | 0.47  | $4.3 \times 10^{-4}$  | 0.57 | 0.56 | 0.48 |
| <i>Herpesviridae</i>    | 42  | 163.97 | 43.17 | 17.87 | 5.40 | 13.7 | 22.1 | 7.6  | 29.7 | 0.48  | $1.4 \times 10^{-3}$  | 0.73 | 0.73 | 0.49 |
| <i>Tymoviridae</i>      | 21  | 6.42   | 0.37  | 22.83 | 7.03 | 19.0 | 28.1 | 9.8  | 35.3 | 0.26  | 0.25                  | 0.50 | 0.48 | 0.53 |
| <i>Betaflexiviridae</i> | 46  | 8.28   | 0.61  | 6.74  | 2.06 | 5.2  | 8.0  | 3.0  | 11.5 | -0.17 | 0.26                  | 0.11 | 0.09 | 0.63 |
| <i>Caulimoviridae</i>   | 36  | 7.82   | 0.44  | 14.55 | 4.21 | 11.0 | 18.2 | 7.2  | 22.4 | 0.08  | 0.66                  | 0.20 | 0.17 | 0.71 |
| <i>Anelloviridae</i>    | 36  | 3.26   | 0.54  | 29.50 | 8.31 | 22.8 | 35.2 | 15.6 | 45.2 | 0.26  | 0.13                  | 0.38 | 0.36 | 0.72 |
| <i>Caliciviridae</i>    | 21  | 7.72   | 0.54  | 8.33  | 2.94 | 6.2  | 9.4  | 4.0  | 17.5 | -0.17 | 0.45                  | 0.15 | 0.10 | 0.73 |
| <i>Dicistroviridae</i>  | 14  | 9.29   | 0.57  | 5.17  | 1.74 | 3.8  | 6.0  | 2.4  | 9.5  | 0.20  | 0.48                  | 0.66 | 0.63 | 0.76 |
| <i>Totiviridae</i>      | 29  | 5.67   | 1.72  | 8.64  | 4.31 | 5.8  | 10.8 | 2.6  | 17.5 | 0.23  | 0.22                  | 0.39 | 0.36 | 0.89 |
| <i>Circoviridae</i>     | 16  | 2.05   | 0.41  | 12.75 | 8.86 | 8.2  | 13.6 | 4.2  | 13.9 | 0.07  | 0.79                  | 0.58 | 0.53 | 0.92 |
| <i>Inoviridae</i>       | 26  | 7.29   | 1.08  | 10.43 | 4.19 | 7.2  | 12.7 | 3.7  | 18.3 | -0.09 | 0.65                  | 0.60 | 0.58 | 1.00 |
