# Supplementary material for: Marked Variability in the Extent of Protein Disorder within and between Viral Families
Source: PubMed Central journal article supplement (PMC3631256; doi:10.1371/journal.pone.0060724), 2013-04-19
Supplement: pone.0060724.s020.pdf [file pone.0060724.s020.pdf]

**Table S6: Comparison of disorder of 17 viral proteins calculated by DISPROT and IUPred.**

| DISPROT ID | Name                               | Organism                                                         | Length | GC | D (%)   |        | Diff. |
|------------|------------------------------------|------------------------------------------------------------------|--------|----|---------|--------|-------|
|            |                                    |                                                                  |        |    | Disprot | Iupred |       |
| DP00560    | Genome Polyprotein                 | Turnip mosaic virus                                              | 3163   | 56 | 6       | 6.35   | 0.35  |
| DP00087    | Alpha trans-inducing protein       | Human herpesvirus 2 (strain HG52) (Human herpes simplex virus 2) | 490    | 70 | 27      | 25.51  | 1.49  |
| DP00066    | Structural polyprotein             | Sindbis virus (subtype Ockelbo / strain Edsbyn 82-5)             | 264    | 51 | 40      | 42.80  | 2.80  |
| DP00431    | polyprotein                        | Sesbania mosaic virus                                            | 962    | 50 | 8       | 12.47  | 4.47  |
| DP00160    | Measles virus nucleocapsid protein | Measles virus                                                    | 525    | 47 | 24      | 28.57  | 4.57  |
| DP00189    | Nef protein                        | Human immunodeficiency virus type 1 (isolate 12)                 | 206    | 42 | 21      | 14.56  | 6.44  |
| DP00424    | REV protein                        | Human immunodeficiency virus 1                                   | 116    | 42 | 47      | 53.45  | 6.45  |
| DP00064    | Coat protein [Precursor]           | Southern bean mosaic virus                                       | 260    | 50 | 25      | 17.69  | 7.31  |
| DP00447    | Phosphoprotein                     | Human respiratory syncytial virus (strain Long)                  | 241    | 34 | 58      | 49.79  | 8.21  |
| DP00585    | Flavivirus E Glycoprotein          | Dengue virus type 2                                              | 395    | 46 | 1       | 11.14  | 10.14 |
| DP00182    | Coat protein VP1                   | Simian virus 40                                                  | 364    | 41 | 15      | 31.59  | 16.59 |
| DP00101    | HIV Type 1 p6 Protein              | Human immunodeficiency virus type 1                              | 499    | 42 | 7       | 27.45  | 20.45 |
| DP00003    | Adenovirus ssDNA binding protein   | Human adenovirus type 5                                          | 529    | 55 | 10      | 31.95  | 21.95 |
| DP00048    | Nef protein                        | Human immunodeficiency virus type 1 (BRU isolate)                | 206    | 42 | 52      | 19.42  | 32.58 |
| DP00024    | E7 protein                         | Human papillomavirus type 16                                     | 98     | 37 | 100     | 41.84  | 58.16 |
| DP00148    | NCp7                               | Human immunodeficiency virus 1                                   | 71     | 42 | 100     | 21.13  | 78.87 |
| DP00542    | VPg                                | Potato virus Y                                                   | 185    | 42 | 100     | 12.97  | 87.03 |
