# Supplementary material for: Marked Variability in the Extent of Protein Disorder within and between Viral Families
Source: PubMed Central journal article supplement (PMC3631256; doi:10.1371/journal.pone.0060724), 2013-04-19
Supplement: pone.0060724.s021.pdf [file pone.0060724.s021.pdf]

**Table S7. Representative list illustrating the most disordered protein of greater than 200 residues from each viral family shown (excluding hypothetical proteins).**

**(A)** Genome size more than 10kb.

| Family                     | Virus                              | Accession    | Product                     | Length | %Disorder |
|----------------------------|------------------------------------|--------------|-----------------------------|--------|-----------|
| <i>Herpesviridae</i>       | Callitrichine herpesvirus 3        | NP_733919    | C4                          | 254    | 100.00    |
| <i>Alloherpesviridae</i>   | Anguillid herpesvirus 1            | YP_003358141 | ORF2L                       | 345    | 95.36     |
| <i>Nimaviridae</i>         | Shrimp white spot syndrome virus   | NP_477701    | wsv179                      | 221    | 93.67     |
| <i>Phycodnaviridae</i>     | Ectocarpus siliculosus virus 1     | NP_077542    | EsV-1-57                    | 358    | 88.27     |
| <i>Podoviridae</i>         | Burkholderia phage BcepIL02        | YP_002922702 | gp30                        | 258    | 86.43     |
| <i>Paramyxoviridae</i>     | Human parainfluenza virus 3        | NP_599250    | D protein                   | 373    | 86.33     |
| <i>Polydnaviridae</i>      | Hyposoter fugitivus ichnovirus     | YP_001031291 | c17.1                       | 352    | 84.38     |
| <i>Siphoviridae</i>        | Mycobacterium phage Pukovnik       | YP_001994825 | gp7                         | 356    | 83.71     |
| <i>Myoviridae</i>          | Pseudomonas phage LMA2             | YP_002154300 | putative structural protein | 297    | 79.46     |
| <i>Adenoviridae</i>        | Porcine adenovirus A               | YP_009215    | 22K                         | 225    | 78.67     |
| <i>Baculoviridae</i>       | Lymantria dispar MNPV              | NP_047640    | mucin-like protein          | 1029   | 75.90     |
| <i>Poxviridae</i>          | Cowpox virus                       | NP_619919    | CPXV136 protein             | 295    | 73.22     |
| <i>Reoviridae</i>          | Rice gall dwarf virus              | YP_001111377 | RNA-binding protein 12      | 206    | 68.93     |
| <i>Ascoviridae</i>         | Spodoptera frugiperda ascovirus 1a | YP_762403    | 64.6 kDa                    | 565    | 68.32     |
| <i>Coronaviridae</i>       | SARS coronavirus                   | NP_828858    | nucleocapsid protein        | 422    | 67.77     |
| <i>Tectiviridae</i>        | Bacillus phage AP50                | YP_002302524 | virion assembly protein     | 235    | 62.98     |
| <i>Malacoherpesviridae</i> | Ostreid herpesvirus 1              | YP_024574    | ORF29                       | 201    | 60.20     |
| <i>Asfarviridae</i>        | African swine fever virus          | NP_042837    | pDP238L                     | 238    | 57.14     |
| <i>Orthomyxoviridae</i>    | Infectious salmon anemia virus     | YP_145796    | P6                          | 234    | 54.70     |
| <i>Rhabdoviridae</i>       | Tupaia virus                       | YP_238530    | protein C                   | 221    | 52.49     |

**(B)** Genome size less than 10kb.

| Family                   | Virus                       | Accession    | Product                              | Length | % disorder |
|--------------------------|-----------------------------|--------------|--------------------------------------|--------|------------|
| <i>Tymoviridae</i>       | Turnip yellow mosaic virus  | NP_663296    | overlapping protein/movement protein | 628    | 91.56      |
| <i>Papillomaviridae</i>  | Human papillomavirus type 5 | NP_041369    | E4                                   | 245    | 86.12      |
| <i>Anelloviridae</i>     | Torque teno virus 3         | YP_003587865 | ORF2/2                               | 281    | 77.22      |
| <i>Polyomaviridae</i>    | Finch polyomavirus          | YP_529830    | putative ORF-X                       | 205    | 68.29      |
| <i>Parvoviridae</i>      | Human bocavirus             | YP_338087    | NP-1                                 | 219    | 55.25      |
| <i>Alphaflexiviridae</i> | Shallot virus X             | NP_620652    | coat protein                         | 262    | 53.82      |
