# Supplementary material for: Marked Variability in the Extent of Protein Disorder within and between Viral Families
Source: PLOS journal article supplement (doi:10.1371/journal.pone.0060724), 2013-04-19
Supplement: S18 (10.1371/journal.pone.0060724.s018) [file journal.pone.0060724.s018]

**Table S4. Correlation of the IUPRED short method used in the main survey with other predictive methods (see text).**

| <b>Method</b>            | <b>Mean</b> | <b>Spearman's<br/>rho</b> |
|--------------------------|-------------|---------------------------|
| IUPRED short             | 12.4        | 1.00                      |
| IUPRED long              | 12.3        | 0.96                      |
| ESPRITZ N                | 19.1        | 0.92                      |
| ESPRITZ X                | 11.0        | 0.94                      |
| IUPRED short,<br>regions | 21.8*       | 0.50                      |
| ESPRITZ N, regions       | 31.6*       | 0.62                      |
| ESPRITZ X, regions       | 24.1*       | 0.68                      |

\* percentage of proteins in a virus that have at least one long disordered region of 30 or more residues.
